# Supplementary material
Source: PubMed Central journal article supplement (PMC8903589)

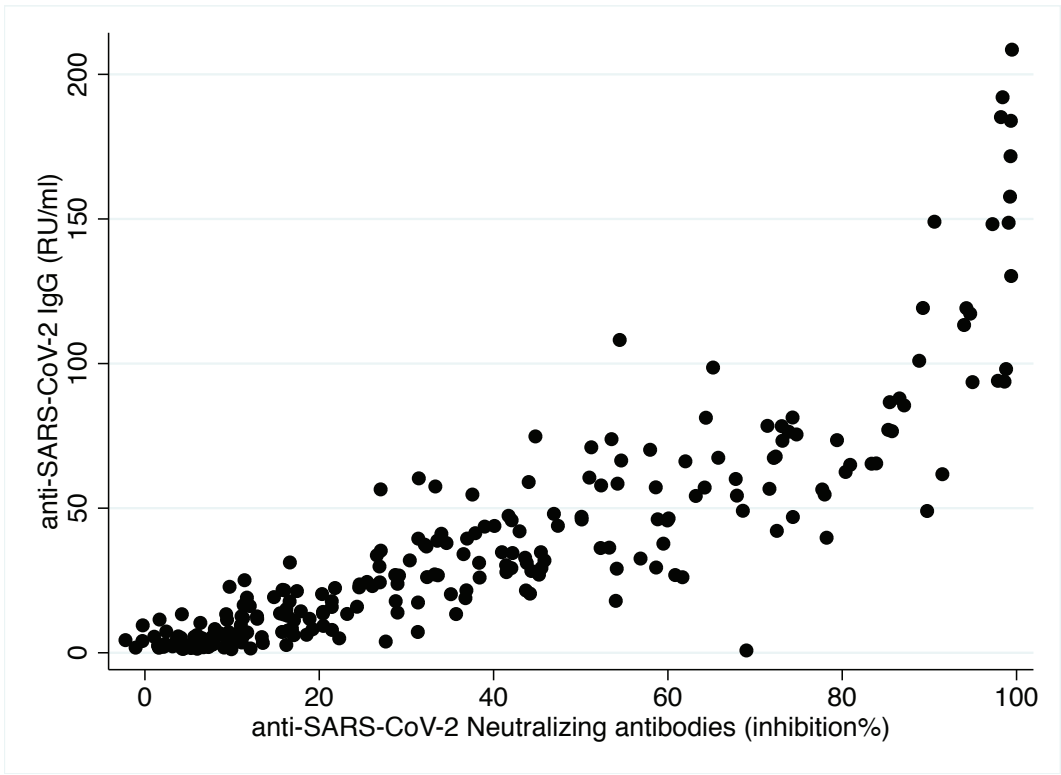

Supplement: ciac167_suppl_supplementary_figure_s1.pdf [file ciac167_suppl_supplementary_figure_s1.pdf]

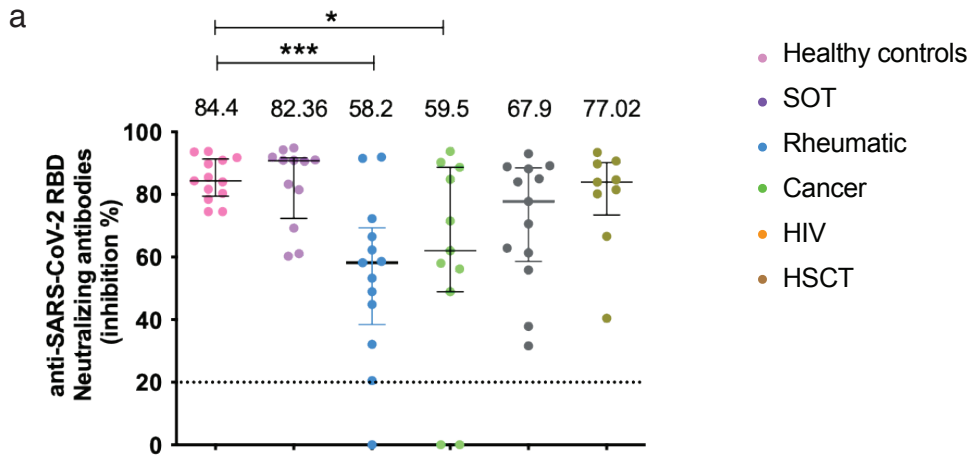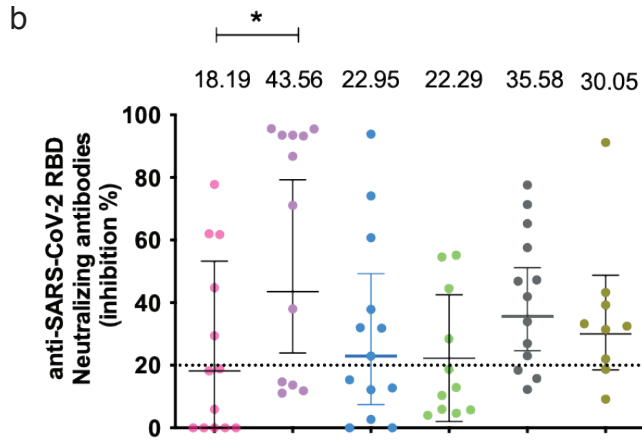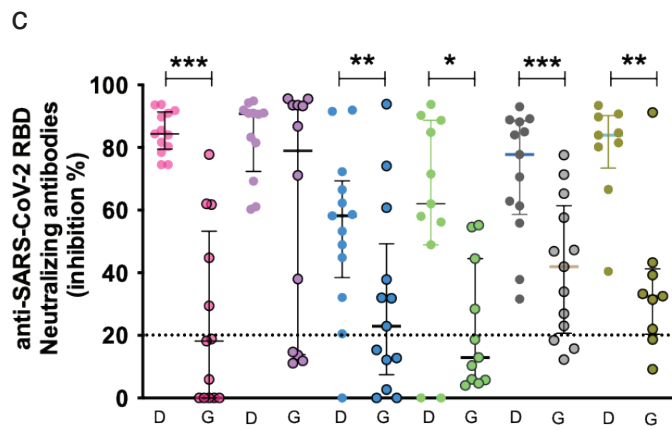

Supplement: ciac167_suppl_supplementary_figure_s2.pdf [file ciac167_suppl_supplementary_figure_s2.pdf]

a

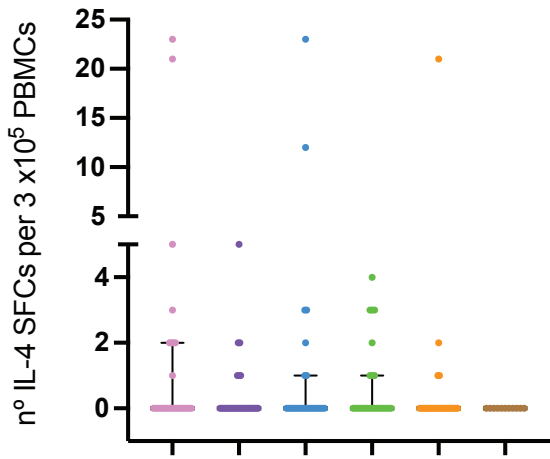

b

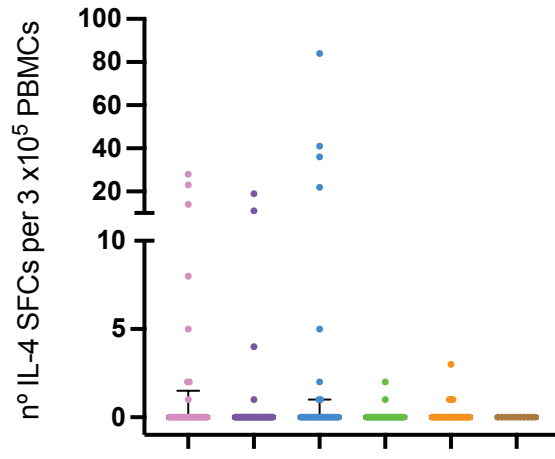

- Healthy controls
- SOT
- Rheumatic
- Cancer
- HIV
- HSCT

Supplement: ciac167_suppl_supplementary_figure_s3.pdf [file ciac167_suppl_supplementary_figure_s3.pdf]
